# Supplementary material for: Enhancing room-temperature NO2 detection of cobalt phthalocyanine based gas sensor at an ultralow laser exposure
Source: Royal Society of Chemistry journal article supplement (doi:10.1039/d0cp02093a), 2020-01-01
Supplement: d0cp02093a1.pdf [file d0cp02093a1.pdf]

**Supporting information**

**Enhancing room-temperature NO<sub>2</sub> detection of cobalt  
phthalocyanine based gas sensor at an ultralow laser exposure**

*Wenkai Jiang, Tao Wang, Xinwei Chen, Bolong Li, Min Zeng, Nantao Hu, Yanjie Su,  
Zhihua Zhou, Yafei Zhang, Zhi Yang\**

*Key Laboratory of Thin Film and Microfabrication (Ministry of Education),  
Department of Micro/Nano Electronics, School of Electronic Information and  
Electrical Engineering, Shanghai Jiao Tong University, Shanghai 200240, P. R. China.*

\*Corresponding author. E-mail address: zhiyang@sjtu.edu.cn (Z. Yang).

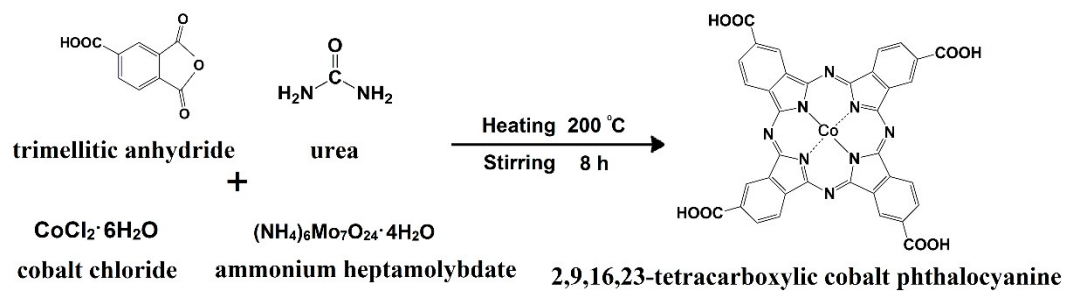

**Figure S1.** The synthesis route for 2,9,16,23-tetracarboxylic cobalt phthalocyanine (CoPc–COOH).

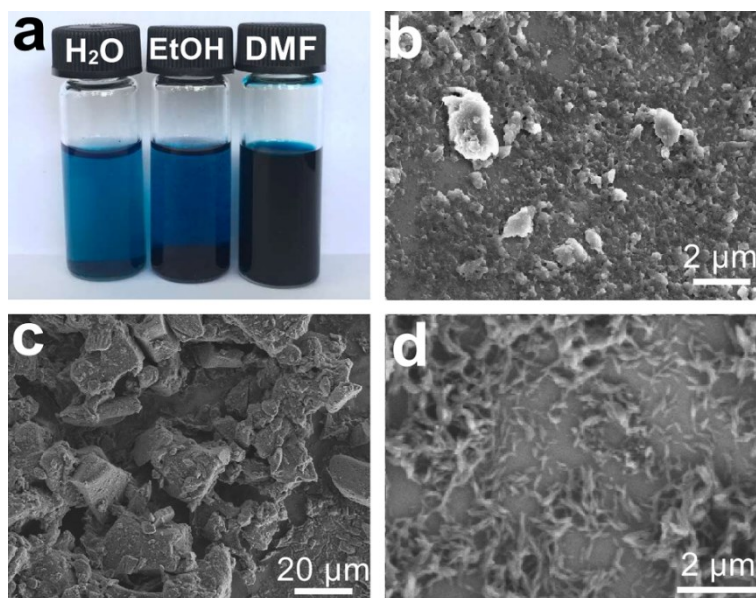

**Figure S2.** (a) The photographs of CoPc-COOH in different solutions. SEM images of the crystalline morphologies of CoPc-COOH in (b) aqueous solution, (c) ethanol solution, and (d) DMF solution.

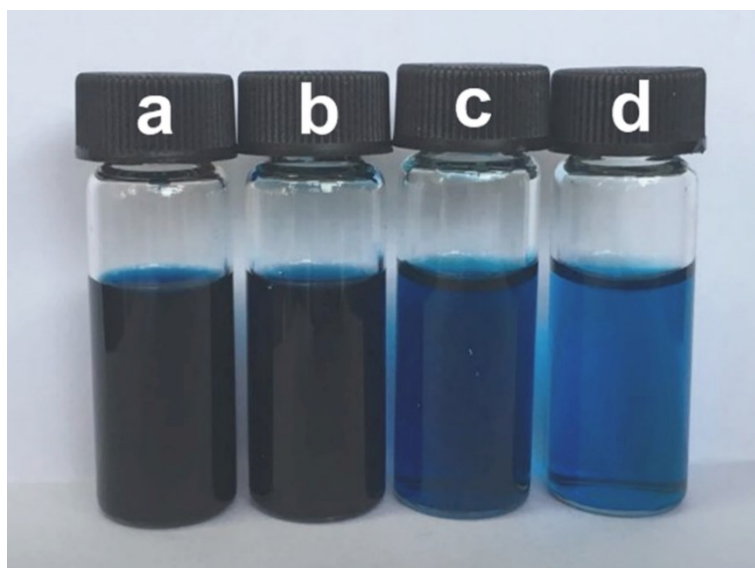

**Figure S3.** The photographs of CoPc-COOH in different concentrations of (a) CoPc-1, (b) CoPc-2, (c) CoPc-3 and (d) CoPc-4.

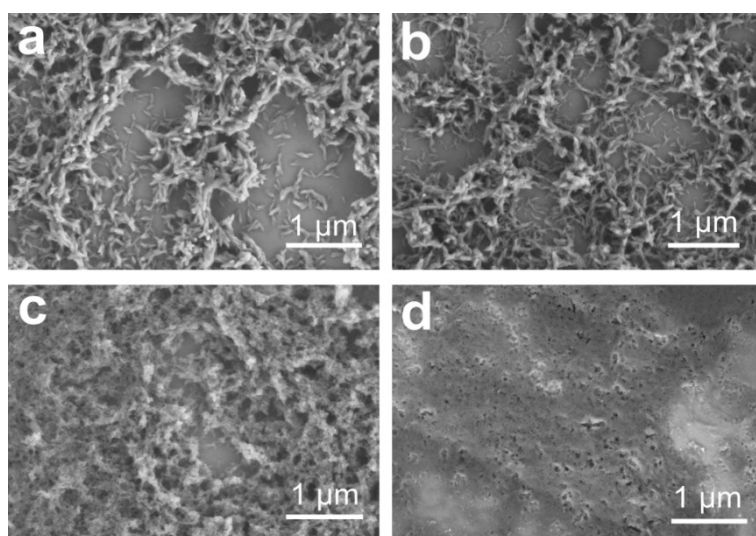

**Figure S4.** SEM images of the crystalline morphologies of (a) CoPc-1, (b) CoPc-2, (c) CoPc-3 and (d) CoPc-4.

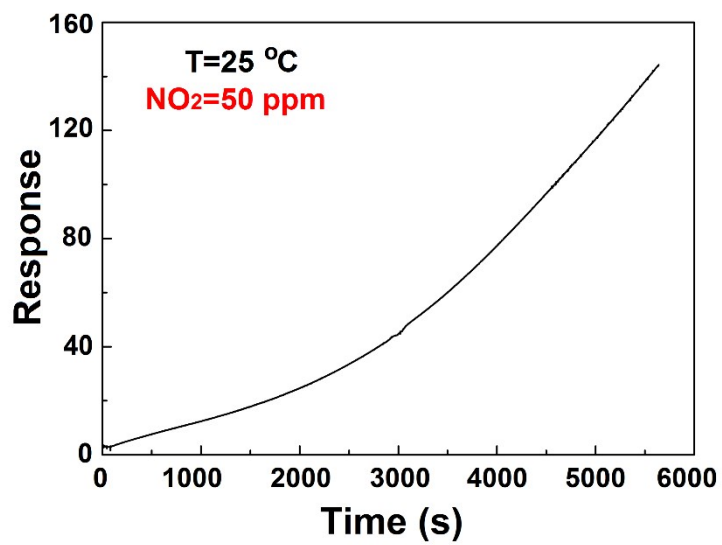

**Figure S5.** The response curve of CoPc-2 to 50 ppm NO<sub>2</sub> gas for more than 5500 s.

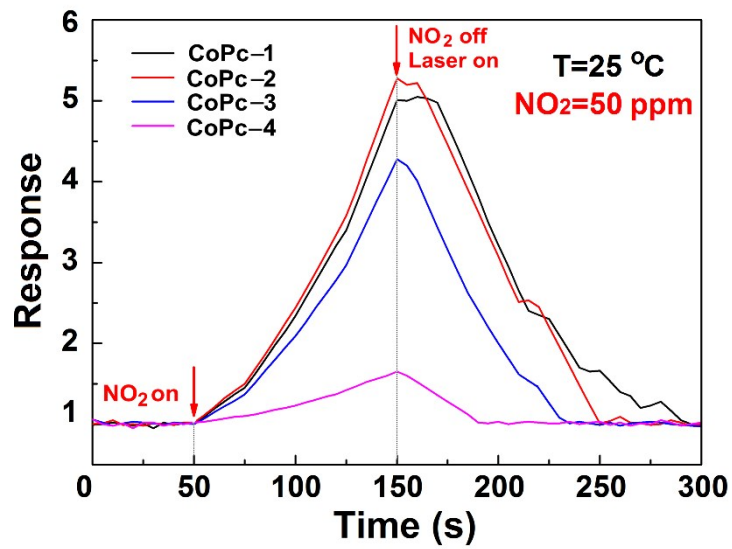

**Figure S6.** The comparison of single response curves of CoPc-1, CoPc-2, CoPc-3 and CoPc-4 to 50 ppm NO<sub>2</sub> gas.

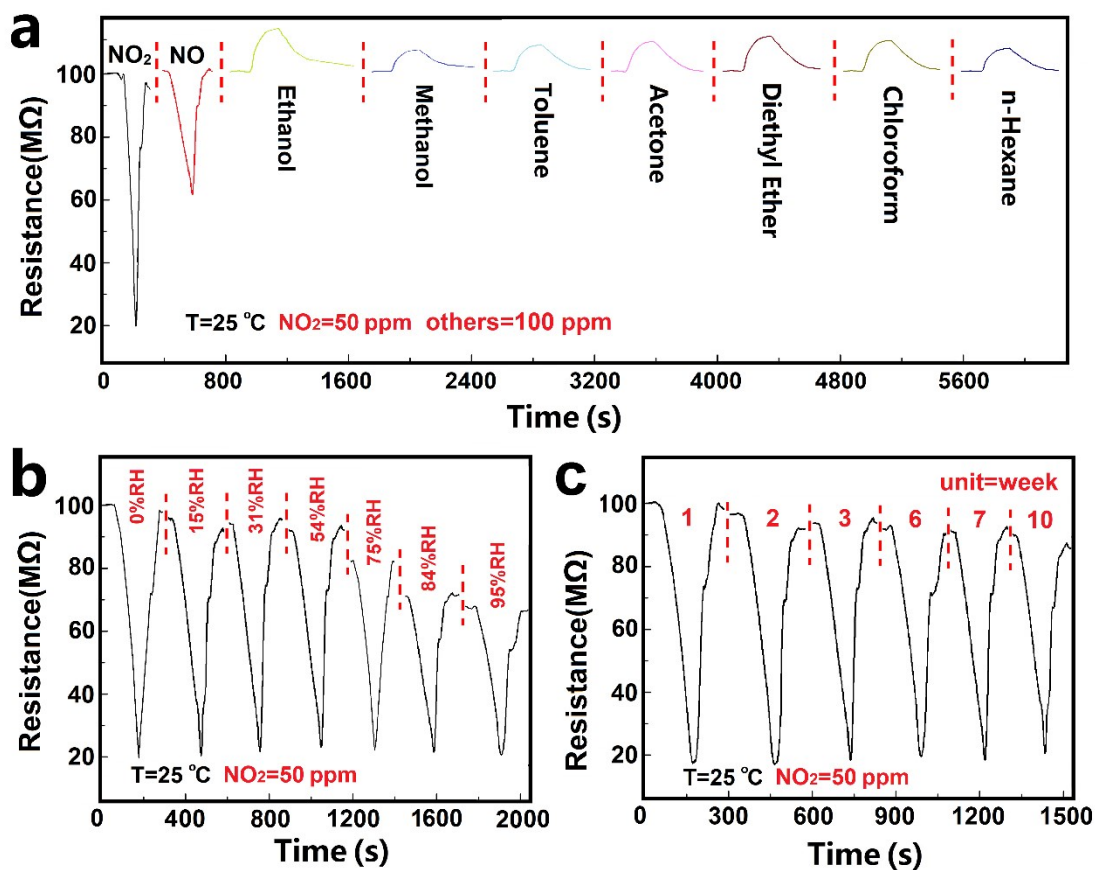

**Figure S7.** The real-time resistance response curves of (a) the selective test, (b) humidity test, and (c) long-term stability test.
